# Supplementary material for: A new perspective on the taxonomy and systematics of Arvicolinae (Gray, 1821) and a new time-calibrated phylogeny for the clade
Source: PeerJ. 2024 Jan 9;12:e16693. doi: 10.7717/peerj.16693 (PMC10785794; doi:10.7717/peerj.16693)
Supplement: Supplemental Information 1 — RAxML and MrBayes files are stored on Dryad. [file peerj-12-16693-s001.xlsx]

## Sheet: Sheet1
		Species Calculations	Species	Missing data	Total	% Missing Data	Cytb (mitochondrial)	COI (mitochondrial)	Ghr (nuclear)	IRBP/RBP3 (nuclear)	BRCA1 (nuclear)	Cytb (Vocher #)	COI (Vocher #)	Ghr (Vocher #)	IRBP/RBP3 (Vocher #)	BRCA1 (Vocher #)	Source of Data
			Alexandromys evoronensis	1676	5857	28.6153	MF099522		KX455573	KX455519	MF099477	ZMMU S-197970		NONE	NONE	FEBRAS 60-08 FSCEATB	Lissovsky, A. A., Petrova, T. V., Yatsentyuk, S. P., Golenishchev, F. N., Putincev, N. I., Kartavtseva, I. V., ... & Abramson, N. I. (2018). Multilocus phylogeny and taxonomy of East Asian voles Alexandromys (Rodentia, Arvicolinae). Zoologica Scripta, 47(1), 9-20.
			Alexandromys fortis	1148	5857	19.6005	MF099554	HM137730	KX455574	JF906129	MF099515	ZMMU S-180437	ZMMU 07AAL-096	NONE	SQCS06008	ZMMU S-178833	Lissovsky, A. A., Petrova, T. V., Yatsentyuk, S. P., Golenishchev, F. N., Putincev, N. I., Kartavtseva, I. V., ... & Abramson, N. I. (2018). Multilocus phylogeny and taxonomy of East Asian voles Alexandromys (Rodentia, Arvicolinae). Zoologica Scripta, 47(1), 9-20. Lissovsky, A. A., Obolenskaya, E. V., Abramson, N. I., Dokuchaev, N. E., Yakimenko, V. V., Mal’kova, M. G., ... & Ivanova, N. V. (2010…
			Alexandromys kikuchii	3051	5857	52.0915	MF099529			AM919410	MF099483	MVZ 180889			NONE	MVZ 180889	Lissovsky, A. A., Petrova, T. V., Yatsentyuk, S. P., Golenishchev, F. N., Putincev, N. I., Kartavtseva, I. V., ... & Abramson, N. I. (2018). Multilocus phylogeny and taxonomy of East Asian voles Alexandromys (Rodentia, Arvicolinae). Zoologica Scripta, 47(1), 9-20.
			Alexandromys limnophilus	1485	5857	25.3543	MK750928	KP190303		AM919426	MF099513	ZMMU:S-189117	NONE		NONE	ZMMU S-181019	Bannikova, A. A., Lebedev, V. S., Poplavskaya, N. S., Simanovsky, S. A., Undrakhbayar, E., Adiya, Y., & Surov, A. S. (2019). Phylogeny and phylogeography of Arvicoline and Lagurine voles of Mongolia. Folia Zoologica, 68(2), 100-113. Liu, S., Jin, W., Liu, Y., Murphy, R. W., Lv, B., Hao, H., ... & Fu, J. (2017). Taxonomic position of Chinese voles of the tribe Arvicolini and the description of 2 n…
			Alexandromys maximowiczii	976	5857	16.6638	MF099559	HM137737	MK750965	KX455524	MF099490	ZMMU S-187569	ZMMU 07AAL-090	ZMMU:S-176552	NONE	ZMMU S-187570	Lissovsky, A. A., Petrova, T. V., Yatsentyuk, S. P., Golenishchev, F. N., Putincev, N. I., Kartavtseva, I. V., ... & Abramson, N. I. (2018). Multilocus phylogeny and taxonomy of East Asian voles Alexandromys (Rodentia, Arvicolinae). Zoologica Scripta, 47(1), 9-20. Lissovsky, A. A., Obolenskaya, E. V., Abramson, N. I., Dokuchaev, N. E., Yakimenko, V. V., Mal’kova, M. G., ... & Ivanova, N. V. (2010…
			Alexandromys middendorffi	1494	5857	25.5079	AF163898	HM137752	AM392390	AM919419	MF099495	Burke Museum, Field Number SAR6117	ZISP TX-01161	T-3509 (Inst. des Sci. de l'Evol.)	NONE	ZMMU S-183385	Conroy, C. J., & Cook, J. A. (2000). Molecular systematics of a Holarctic rodent (Microtus: Muridae). Journal of Mammalogy, 81(2), 344-359. Lissovsky, A. A., Obolenskaya, E. V., Abramson, N. I., Dokuchaev, N. E., Yakimenko, V. V., Mal’kova, M. G., ... & Ivanova, N. V. (2010). Geographic variation of Microtus middendorffii (Cricetidae, Arvicolinae, Rodentia) sensu lato studied by craniometrical an…
KEY			Alexandromys mongolicus	1053	5857	17.9785	MK750927	HM137754	MK750962	KX455527	MK750997	personal:Vladimir Lebedev:Mmong_2013_63	ZMMU 07AAL-141	ZMMU:S-182195	NONE	ZMMU:S-182195	Bannikova, A. A., Lebedev, V. S., Poplavskaya, N. S., Simanovsky, S. A., Undrakhbayar, E., Adiya, Y., & Surov, A. S. (2019). Phylogeny and phylogeography of Arvicoline and Lagurine voles of Mongolia. Folia Zoologica, 68(2), 100-113. Lissovsky, A. A., Obolenskaya, E. V., Abramson, N. I., Dokuchaev, N. E., Yakimenko, V. V., Mal’kova, M. G., ... & Ivanova, N. V. (2010). Geographic variation of Micro…
BLANK= NOT PRESENT			Alexandromys montebelli	2219	5857	37.8863	MF099543		AM910793	AM919421	MF099502	MSB 45375		NONE	NONE	MSB 45375	Lissovsky, A. A., Petrova, T. V., Yatsentyuk, S. P., Golenishchev, F. N., Putincev, N. I., Kartavtseva, I. V., ... & Abramson, N. I. (2018). Multilocus phylogeny and taxonomy of East Asian voles Alexandromys (Rodentia, Arvicolinae). Zoologica Scripta, 47(1), 9-20.
NONE=SPECIMEN PRESENT BUT NO VOUCHER			Alexandromys mujanensis	1658	5857	28.308	MF099542		KX455583	KX455528	MF099514	ZIN 100615		NONE	NONE	ZIN 98511	Lissovsky, A. A., Petrova, T. V., Yatsentyuk, S. P., Golenishchev, F. N., Putincev, N. I., Kartavtseva, I. V., ... & Abramson, N. I. (2018). Multilocus phylogeny and taxonomy of East Asian voles Alexandromys (Rodentia, Arvicolinae). Zoologica Scripta, 47(1), 9-20.
			Alexandromys oeconomus	972	5857	16.5955	MF099579	KF152999	KP057334	KP057387	MF099516	ZMMU S-181806	JW19	NONE	NONE	ZMMU S-183389	Lissovsky, A. A., Petrova, T. V., Yatsentyuk, S. P., Golenishchev, F. N., Putincev, N. I., Kartavtseva, I. V., ... & Abramson, N. I. (2018). Multilocus phylogeny and taxonomy of East Asian voles Alexandromys (Rodentia, Arvicolinae). Zoologica Scripta, 47(1), 9-20.Yin, Y., Jiang, W., Zhang, Z., Li, Y., Twenke, B., Turghan, M., ... & Liu, B. (2014). The divergence of small mammals in Xinjiang, Chin…
			Alexandromys sachalinensis	3756	5857	64.1284	MF099549				MF099517	ZMMU S-184749				ZMMU S-187188	Lissovsky, A. A., Petrova, T. V., Yatsentyuk, S. P., Golenishchev, F. N., Putincev, N. I., Kartavtseva, I. V., ... & Abramson, N. I. (2018). Multilocus phylogeny and taxonomy of East Asian voles Alexandromys (Rodentia, Arvicolinae). Zoologica Scripta, 47(1), 9-20.
			Alexandromys shantaricus	4717	5857	80.5361	MT990636					personal collection:Nikolay Dokuchaev:201					Lebevdev, V. 2020
			Alticola argentatus	2108	5857	35.9911	KJ556727		MK521843	KJ556777	KC962238	UVM:VT431		478	UVM:VT431	NONE	Kohli, B. A., Speer, K. A., Kilpatrick, C. W., Batsaikhan, N., Damdinbaza, D., & Cook, J. A. (2014). Multilocus systematics and non-punctuated evolution of Holarctic Myodini (Rodentia: Arvicolinae). Molecular Phylogenetics and Evolution, 76, 18-29. Bodrov, S. Y., Vasiljeva, V. K., Okhlopkov, I. M., Mamayev, N. V., Zakharov, E. S., Oleinikov, A. Y., ... & Abramson, N. I. (2020). Evolutionary histo…
			Alticola barakshin	2141	5857	36.5546	DQ845194		KC962281	KJ556753	KC962234	MSUMZ 179592		NONE	MSB:Mamm:233811	NONE	Lebedev, V. S., Bannikova, A. A., Tesakov, A. S., & Abramson, N. I. (2007). Molecular phylogeny of the genus Alticola (Cricetidae, Rodentia) as inferred from the sequence of the cytochrome b gene. Zoologica scripta, 36(6), 547-563. Bodrov, S. Y., Kostygov, A. Y., Rudneva, L. V., & Abramson, N. I. (2016). Revision of the taxonomic position of the Olkhon mountain vole (Rodentia, Cricetidae). Biolog…
			Alticola lemminus	1807	5857	30.852	KJ556633		MK521869	KJ556744	MK513502	MSB:Mamm:149892		4848	MSB:Mamm:149892	555	Kohli, B. A., Speer, K. A., Kilpatrick, C. W., Batsaikhan, N., Damdinbaza, D., & Cook, J. A. (2014). Multilocus systematics and non-punctuated evolution of Holarctic Myodini (Rodentia: Arvicolinae). Molecular Phylogenetics and Evolution, 76, 18-29. Bodrov, S. Y., Vasiljeva, V. K., Okhlopkov, I. M., Mamayev, N. V., Zakharov, E. S., Oleinikov, A. Y., ... & Abramson, N. I. (2020). Evolutionary histo…
			Alticola macrotis	1645	5857	28.0861	AY309411		MK521850	KC962307	MK513463	AF7474		3497	NONE	27	Cook, J. A., Runck, A. M., & Conroy, C. J. (2004). Historical biogeography at the crossroads of the northern continents: molecular phylogenetics of red-backed voles (Rodentia: Arvicolinae). Molecular Phylogenetics and Evolution, 30(3), 767-777. Bodrov, S. Y., Vasiljeva, V. K., Okhlopkov, I. M., Mamayev, N. V., Zakharov, E. S., Oleinikov, A. Y., ... & Abramson, N. I. (2020). Evolutionary history o…
			Alticola olchonensis	2326	5857	39.7132	KR869166		KC962279	KC962305	KC962236	61013		NONE	NONE	NONE	Litvinov, Y. N., Abramov, S. A., Chertilina, O. V., Simonov, E. P., & Lopatina, N. V. (2015). Genetic differentiation of high-mountain voles from mountain steppe regions of northeast inner Asia. Izv. Irkutsk. gosud. univ. Biol. Ekol, 12, 23-30. Bodrov, S. Y., Kostygov, A. Y., Rudneva, L. V., & Abramson, N. I. (2016). Revision of the taxonomic position of the Olkhon mountain vole (Rodentia, Cricet…
			Alticola semicanus	1953	5857	33.3447	DQ845193		KC962286	KJ556765	JN244733	MSUMZ 179593		NONE	MSB:Mamm:98508	ZMMU S-179263 f.c. 85	Lebedev, V. S., Bannikova, A. A., Tesakov, A. S., & Abramson, N. I. (2007). Molecular phylogeny of the genus Alticola (Cricetidae, Rodentia) as inferred from the sequence of the cytochrome b gene. Zoologica scripta, 36(6), 547-563. Bodrov, S. Y., Kostygov, A. Y., Rudneva, L. V., & Abramson, N. I. (2016). Revision of the taxonomic position of the Olkhon mountain vole (Rodentia, Cricetidae). Biolog…
			Alticola stoliczkanus	3279	5857	55.9843	MF040961	KY968260				Rui Liao SAF08076 (Museum of Sichuan Academy of Forestry)	NONE				Tang, M. K., Jin, W., Tang, Y., Yan, C. C., Murphy, R. W., Sun, Z. Y., ... & Liu, S. Y. (2018). Reassessment of the taxonomic status of Craseomys and three controversial species of Myodes and Alticola (Rodentia: Arvicolinae). Zootaxa, 4429(1), 1-52.
			Alticola strelzowi	2138	5857	36.5033	KJ556698		KC962287	KJ556756	KC962246	MSB:Mamm:233728		NONE	MSB:Mamm:233728	NONE	Kohli, B. A., Speer, K. A., Kilpatrick, C. W., Batsaikhan, N., Damdinbaza, D., & Cook, J. A. (2014). Multilocus systematics and non-punctuated evolution of Holarctic Myodini (Rodentia: Arvicolinae). Molecular Phylogenetics and Evolution, 76, 18-29. Bodrov, S. Y., Kostygov, A. Y., Rudneva, L. V., & Abramson, N. I. (2016). Revision of the taxonomic position of the Olkhon mountain vole (Rodentia, Cr…
			Alticola tuvinicus	2061	5857	35.1887	KR869163		JN244720	KC962303	JN244732	61094		Alt35-2010_Tu	NONE	Alt35-2010_Tu	Litvinov, Y. N., Abramov, S. A., Chertilina, O. V., Simonov, E. P., & Lopatina, N. V. (2015). Genetic differentiation of high-mountain voles from mountain steppe regions of northeast inner Asia. Izv. Irkutsk. gosud. univ. Biol. Ekol, 12, 23-30. Bannikova, A. A., Sighazeva, A. M., Malikov, V. G., Golenishchev, F. N., & Dzuev, R. I. (2013). Genetic diversity of Chionomys genus (Mammalia, Arvicolina…
			Anteliomys chinensis	2398	5857	40.9425	JF906126	KF999162	GQ374497	MH043425		MGD-5-20	m27	NONE	NONE		Chen, W. C., Hao, H. B., Sun, Z. Y., Liu, Y., Liu, S. Y., & Yue, B. S. (2012). Phylogenetic position of the genus Proedromys (Arvicolinae, Rodentia): Evidence from nuclear and mitochondrial DNA. Biochemical Systematics and Ecology, 42, 59-68. Li, J., Zheng, X., Cai, Y., Zhang, X., Yang, M., Yue, B., & Li, J. (2015). DNA barcoding of murinae (Rodentia: Muridae) and arvicolinae (Rodentia: Cricetida…
			Anteliomys custos	2277	5857	38.8766	MW682734	KY997266		MH043411		KIZ:YL160014	NONE		NONE		Song, W., Li, X., Wang, H., Chen, Z., He, S., & Jiang, X. (2021). Multi-dimensional evaluation of small mammal diversity in tree line habitats across the Three Parallel Rivers of Yunnan Protected Areas: Implications for conservation. Biodiversity Science, 29(9), 1215.
			Anteliomys olitor	2272	5857	38.7912	MW682697	KY997221		MH043404		KIZ:XMS170002	NONE		NONE		Song, W., Li, X., Wang, H., Chen, Z., He, S., & Jiang, X. (2021). Multi-dimensional evaluation of small mammal diversity in tree line habitats across the Three Parallel Rivers of Yunnan Protected Areas: Implications for conservation. Biodiversity Science, 29(9), 1215.
			Anteliomys proditor	2359	5857	40.2766	KY753982	KY997291		KJ556772		UWBM:Mamm:75296	NONE		UWBM:75307		Steppan, S. J., & Schenk, J. J. (2017). Muroid rodent phylogenetics: 900-species tree reveals increasing diversification rates. PloS one, 12(8), e0183070. Kohli, B. A., Speer, K. A., Kilpatrick, C. W., Batsaikhan, N., Damdinbaza, D., & Cook, J. A. (2014). Multilocus systematics and non-punctuated evolution of Holarctic Myodini (Rodentia: Arvicolinae). Molecular Phylogenetics and Evolution, 76, 18…
			Anteliomys wardi	2269	5857	38.74	JQ818224	KY997275		MH043398		NONE	NONE		NONE		Zeng, T., Jin, W., Sun, Z. Y., Liu, Y., Murphy, R. W., Fu, J. R., ... & Yue, B. S. (2013). Taxonomic position of Eothenomys wardi (Arvicolinae: Cricetidae) based on morphological and molecular analyses with a detailed description of the species. Zootaxa, 3682(1), 085-104.
			Arborimus albipes	5431	5857	92.7267	KY753946					UWBM:Mamm:79504					Steppan, S. J., & Schenk, J. J. (2017). Muroid rodent phylogenetics: 900-species tree reveals increasing diversification rates. PloS one, 12(8), e0183070.
			Arborimus longicaudus	2761	5857	47.1402	KY753947		MF074861	MF097715		UWBM:Mamm:78048		UWBM:Mamm:78048	UWBM:Mamm:78048		Steppan, S. J., & Schenk, J. J. (2017). Muroid rodent phylogenetics: 900-species tree reveals increasing diversification rates. PloS one, 12(8), e0183070.
			Arborimus pomo	5193	5857	88.6631	AY338825					NONE					Bellinger, M. R., Haig, S. M., Forsman, E. D., & Mullins, T. D. (2005). Taxonomic relationships among Phenacomys voles as inferred by cytochrome b. Journal of Mammalogy, 86(1), 201-210.
			Arvicola amphibius	1123	5857	19.1736	MF099519	MZ661171	KX455563	MZ661186	MF099473	ZMMU S-183486	CSCF-MAM-1203171	ZIN_97411	CSCF-MAM-1203171	ZMMU S-183486	Lissovsky, A. A., Petrova, T. V., Yatsentyuk, S. P., Golenishchev, F. N., Putincev, N. I., Kartavtseva, I. V., ... & Abramson, N. I. (2018). Multilocus phylogeny and taxonomy of East Asian voles Alexandromys (Rodentia, Arvicolinae). Zoologica Scripta, 47(1), 9-20.
			Arvicola persicus	3744	5857	63.9235	MN165753			MN165756		NONE			NONE		Mahmoudi, A., Maul, L. C., Khoshyar, M., Darvish, J., Aliabadian, M., & Kryštufek, B. (2020). Evolutionary history of water voles revisited: confronting a new phylogenetic model from molecular data with the fossil record. Mammalia, 84(2), 171-184.
			Arvicola sapidus	3689	5857	62.9845	JX457749			JX457668		CIBIO's small mammal tissue collection, University of Porto, SM1535			CIBIO's small mammal tissue collection, University of Porto, SM883		Barbosa, S., Pauperio, J., Searle, J. B., & Alves, P. C. (2013). Genetic identification of I berian rodent species using both mitochondrial and nuclear loci: Application to noninvasive sampling. Molecular Ecology Resources, 13(1), 43-56.
			Bramus fuscocapillus	3960	5857	67.6114	AF126430		MN735809			AF27783, University of Alaska Museum, University of Alaska Fairbanks		NONE			Conroy, C. J., & Cook, J. A. (1999). MtDNA evidence for repeated pulses of speciation within arvicoline and murid rodents. Journal of Mammalian Evolution, 6, 221-245. Bondareva, O., Genelt-Yanovskiy, E., Petrova, T., Bodrov, S., Smorkatcheva, A., & Abramson, N. (2021). Signatures of Adaptation in Mitochondrial Genomes of Palearctic Subterranean Voles (Arvicolinae, Rodentia). Genes, 12(12), 1945.
			Bramus lutescens	2096	5857	35.7862	MG264362		MN735808	MT478753	MT478726	26776		NONE	25157	26776	Lebedev, V., Bogdanov, A., Brandler, O., Melnikova, M., Enkhbat, U., Tukhbatullin, A., ... & Bannikova, A. (2020). Cryptic variation in mole voles Ellobius (Arvicolinae, Rodentia) of Mongolia. Zoologica Scripta, 49(5), 535-548. Bondareva, O., Genelt-Yanovskiy, E., Petrova, T., Bodrov, S., Smorkatcheva, A., & Abramson, N. (2021). Signatures of Adaptation in Mitochondrial Genomes of Palearctic Subt…
			Caryomys eva	3139	5857	53.594	KX354157	KC861420		KJ556767		ZMMU:S-195186	ARB0004938		UWBM:75247		Sheftel, B. I., Bannikova, A. A., Fang, Y., Demidova, T. B., Alexandrov, D. Y., Lebedev, V. S., & Sun, Y. H. (2018). Notes on the fauna, systematics, and ecology of small mammals in Southern Gansu, China. Biology Bulletin, 45, 898-912. He, K., Wang, W., Li, Q., Luo, P., Sun, Y., & Jiang, X. (2013). DNA barcoding in surveys of small mammal community: a case study in Lianhuashan, Gansu Province, Ch…
			Caryomys inez	2272	5857	38.7912	KY997389	KY997228		MH043369		NONE	NONE		NONE		Liu,S., Sun,Z., Jin,W., He,K., Murphy,R.W. and Jiang,X. 2019
			Chionomys gud	1651	5857	28.1885	JN244696		JN244714	KX455510	JN244726	KBSU S-3299 Ch gud 19-10		ZIN 100239 f.c. Ch gud M-07	NONE	KBSU S-3164	Bannikova, A. A., Sighazeva, A. M., Malikov, V. G., Golenishchev, F. N., & Dzuev, R. I. (2013). Genetic diversity of Chionomys genus (Mammalia, Arvicolinae) and comparative phylogeography of snow voles. Russian Journal of Genetics, 49, 561-575.Bannikova, A. A., Sighazeva, A. M., Malikov, V. G., Golenishchev, F. N., & Dzuev, R. I. (2013). Genetic diversity of Chionomys genus (Mammalia, Arvicolinae…
			Chionomys nivalis	1356	5857	23.1518	KT175903	AY332687	JN244718	KT175905	KP057311	SM2226	P59	ZIN 98639	SM2227	ZIN 98639	Barros, P., Vale-Gonçalves, H. M., Paupério, J., Cabral, J. A., & Rosa, G. (2016). Confirmation of European snow vole Chionomys nivalis (Mammalia: Rodentia: Cricetidae) occurrence in Portugal. Italian Journal of Zoology, 83(1), 139-145. Pfunder, M., Holzgang, O., & Frey, J. E. (2004). Development of microarray‐based diagnostics of voles and shrews for use in biodiversity monitoring studies, and e…
			Chionomys roberti	2906	5857	49.6158	JN244704		JN244717		JN244729	KBSU S-3207 Ch rob 12-10		KBSU S-3307 f.c. Ch rob 8-10		KBSU S-3307	Bannikova, A. A., Sighazeva, A. M., Malikov, V. G., Golenishchev, F. N., & Dzuev, R. I. (2013). Genetic diversity of Chionomys genus (Mammalia, Arvicolinae) and comparative phylogeography of snow voles. Russian Journal of Genetics, 49, 561-575.
			Clethrionomys californicus	2818	5857	48.1134	AY309423		MF074901	KJ556775		LHS541		MVZ:Mamm:208823	UWBM:80363		Cook, J. A., Runck, A. M., & Conroy, C. J. (2004). Historical biogeography at the crossroads of the northern continents: molecular phylogenetics of red-backed voles (Rodentia: Arvicolinae). Molecular Phylogenetics and Evolution, 30(3), 767-777. Steppan, S. J., & Schenk, J. J. (2017). Muroid rodent phylogenetics: 900-species tree reveals increasing diversification rates. PloS one, 12(8), e0183070.…
			Clethrionomys centralis	2145	5857	36.6228	KJ556626	KY968255		KJ556738		MSB:Mamm:158508	NONE		MSB:Mamm:158508		Kohli, B. A., Speer, K. A., Kilpatrick, C. W., Batsaikhan, N., Damdinbaza, D., & Cook, J. A. (2014). Multilocus systematics and non-punctuated evolution of Holarctic Myodini (Rodentia: Arvicolinae). Molecular Phylogenetics and Evolution, 76, 18-29. Tang, M. K., Jin, W., Tang, Y., Yan, C. C., Murphy, R. W., Sun, Z. Y., ... & Liu, S. Y. (2018). Reassessment of the taxonomic status of Craseomys and …
			Clethrionomys gapperi	1132	5857	19.3273	KJ789561	JF456940	MF074902	KJ556760	AY295010	UAM:77807	HLC-16340	FMNH:MAMM:145956	MSB:Mamm:70688	FMNH 145956	Kohli, B. A., Fedorov, V. B., Waltari, E., & Cook, J. A. (2015). Phylogeography of a Holarctic rodent (Myodes rutilus): Testing high‐latitude biogeographical hypotheses and the dynamics of range shifts. Journal of Biogeography, 42(2), 377-389. Eger,J.L., Engstrom,M.D., Lim,B.K., Millar,J.S., Lobo,N.,Pruitt,W.O., Ivanova,N.V., Borisenko,A.V. and Hebert,P.D.N. Steppan, S. J., & Schenk, J. J. (2017)…
			Clethrionomys glareolus	1010	5857	17.2443	AM392368	JF499324	AM392384	MZ661182	JX440346	T-1389 (Inst. des Sci. de l'Evol.)	ZMMU 07AAL-088	T-1389 (Inst. des Sci. de l'Evol.)	CSCF-MAM-1323584	f.c.20-11_15	Galewski, T., Tilak, M. K., Sanchez, S., Chevret, P., Paradis, E., & Douzery, E. J. (2006). The evolutionary radiation of Arvicolinae rodents (voles and lemmings): relative contribution of nuclear and mitochondrial DNA phylogenies. BMC Evolutionary Biology, 6, 1-17. Lissovsky,A., Lim,B.K., Eger,J.L., Abramson,N.I. and Obolenskaya,E.V. Bannikova, A. A., Sighazeva, A. M., Malikov, V. G., Golenishch…
			Clethrionomys rutilus	1248	5857	21.3078	AY309427	HM380209	KY968295	KJ765262	MF099511	AF2041	NOMAM-042	NONE	MSB:Mamm:268622	ZMMU S-183523	Cook, J. A., Runck, A. M., & Conroy, C. J. (2004). Historical biogeography at the crossroads of the northern continents: molecular phylogenetics of red-backed voles (Rodentia: Arvicolinae). Molecular Phylogenetics and Evolution, 30(3), 767-777. Tang, M. K., Jin, W., Tang, Y., Yan, C. C., Murphy, R. W., Sun, Z. Y., ... & Liu, S. Y. (2018). Reassessment of the taxonomic status of Craseomys and thre…
			Craseomys andersoni	2815	5857	48.0621	KJ556708		AM392391	KJ556764		MSB:Mamm:45699		T-1341 (Inst. des Sci. de l'Evol.)	MSB:Mamm:45699		Kohli, B. A., Speer, K. A., Kilpatrick, C. W., Batsaikhan, N., Damdinbaza, D., & Cook, J. A. (2014). Multilocus systematics and non-punctuated evolution of Holarctic Myodini (Rodentia: Arvicolinae). Molecular Phylogenetics and Evolution, 76, 18-29. Galewski, T., Tilak, M. K., Sanchez, S., Chevret, P., Paradis, E., & Douzery, E. J. (2006). The evolutionary radiation of Arvicolinae rodents (voles a…
			Craseomys rex	1146	5857	19.5663	AB565463	JF693314	MN735812	MN735883	MN735801	personal:Nakata K:KN98104	ZIN:98136	NONE	ZIN:98136	ZIN:98136	Iwasa, M. A., & Nakata, K. (2011). A note on the genetic status of the dark red-backed vole, Myodes rex, in Hokkaido, Japan. Mammal study, 36(2), 99-103. Abramson, N. I., Petrova, T. V., Dokuchaev, N. E., Obolenskaya, E. V., & Lissovsky, A. A. (2012). Phylogeography of the gray red-backed vole Craseomys rufocanus (Rodentia: Cricetidae) across the distribution range inferred from nonrecombining mo…
			Craseomys rufocanus	1772	5857	30.2544	KJ556703	JF903285	KX455562	KJ556761	KX455590	MSB:Mamm:215593	ZISP:TX-01253	IBPN_6119	MSB:Mamm:215593	IBPN_6119	Kohli, B. A., Speer, K. A., Kilpatrick, C. W., Batsaikhan, N., Damdinbaza, D., & Cook, J. A. (2014). Multilocus systematics and non-punctuated evolution of Holarctic Myodini (Rodentia: Arvicolinae). Molecular Phylogenetics and Evolution, 76, 18-29. Abramson, N. I., Petrova, T. V., Dokuchaev, N. E., Obolenskaya, E. V., & Lissovsky, A. A. (2012). Phylogeography of the gray red-backed vole Craseomys…
			Craseomys smithii	3683	5857	62.882	KJ556701			KJ556759		MSB:Mamm:45314			MSB:Mamm:45314		Kohli, B. A., Speer, K. A., Kilpatrick, C. W., Batsaikhan, N., Damdinbaza, D., & Cook, J. A. (2014). Multilocus systematics and non-punctuated evolution of Holarctic Myodini (Rodentia: Arvicolinae). Molecular Phylogenetics and Evolution, 76, 18-29.
			Cricetus cricetus	1064	5857	18.1663	KR089014	KC953838	MG685553	AY277410	KC953168	MVZ:155880	ZFMK:MAM-2008.140	NONE	MVZ 155880	MVZ:155880	Alhajeri, B. H., Hunt, O. J., & Steppan, S. J. (2015). Molecular systematics of gerbils and deomyines (R odentia: G erbillinae, D eomyinae) and a test of desert adaptation in the tympanic bulla. Journal of Zoological Systematics and Evolutionary Research, 53(4), 312-330. Schröder, O., Astrin, J., & Hutterer, R. (2014). White chest in the west: pelage colour and mitochondrial variation in the comm…
			Dicrostonyx groenlandicus	3000	5857	51.2208	KJ556713	JF456156		KJ556766		ROM:97339	ROM:97248		ROM:97339		Kohli, B. A., Speer, K. A., Kilpatrick, C. W., Batsaikhan, N., Damdinbaza, D., & Cook, J. A. (2014). Multilocus systematics and non-punctuated evolution of Holarctic Myodini (Rodentia: Arvicolinae). Molecular Phylogenetics and Evolution, 76, 18-29.; Eger,J.L., Engstrom,M.D., Lim,B.K., Millar,J.S., Lobo,N., Pruitt,W.O., Ivanova,N.V., Borisenko,A.V. and Hebert,P.D.N.
			Dicrostonyx hudsonius	2240	5857	38.2448	KY753975	JF456472	MF074869	MF097721		CM:M:96670	ROM:96672	ROM:MAM:96670	ROM:MAM:96670		Steppan, S. J., & Schenk, J. J. (2017). Muroid rodent phylogenetics: 900-species tree reveals increasing diversification rates. PloS one, 12(8), e0183070. Eger,J.L., Engstrom,M.D., Lim,B.K., Millar,J.S., Lobo,N.,Pruitt,W.O., Ivanova,N.V., Borisenko,A.V. and Hebert,P.D.N.
			Dicrostonyx richardsoni	4702	5857	80.28	KC469636	JF456593				CM:M:12961	ROM:97340				Fulton, T. L., Norris, R. W., Graham, R. W., Semken Jr, H. A., & Shapiro, B. (2013). Ancient DNA supports southern survival of R ichardson's collared lemming (D icrostonyx richardsoni) during the last glacial maximum. Molecular ecology, 22(9), 2540-2548. Eger,J.L., Engstrom,M.D., Lim,B.K., Millar,J.S., Lobo,N.,Pruitt,W.O., Ivanova,N.V., Borisenko,A.V. and Hebert,P.D.N.
			Dicrostonyx torquatus	2105	5857	35.9399	JX867565		AM392381	MN735875	MK513504	H02		T-1337 (Inst. des Sci. de l'Evol.)	NONE	664	Brace, S., Palkopoulou, E., Dalén, L., Lister, A. M., Miller, R., Otte, M., ... & Barnes, I. (2012). Serial population extinctions in a small mammal indicate Late Pleistocene ecosystem instability. Proceedings of the National Academy of Sciences, 109(50), 20532-20536. Galewski, T., Tilak, M. K., Sanchez, S., Chevret, P., Paradis, E., & Douzery, E. J. (2006). The evolutionary radiation of Arvicoli…
			Dinaromys bogdanovi	1601	5857	27.3348	MT093197		MT093192	MT093193	MT093191	Lyublyana NHM, 227/07		Lyublyana NHM, 227/08	Lyublyana NHM, 227/09	Lyublyana NHM, 227/06	Abramson 2020
			Ellobius talpinus	2112	5857	36.0594	MG264359		GQ142005	MT478779	MT478752	26491		NONE	26802	26802	Bakloushinskaya, I., Lyapunova, E. A., Saidov, A. S., Romanenko, S. A., O’Brien, P. C., Serdyukova, N. A., ... & Bogdanov, A. S. (2019). Rapid chromosomal evolution in enigmatic mammal with XX in both sexes, the Alay mole vole Ellobiusalaicus Vorontsov et al., 1969 (Mammalia, Rodentia). Comparative Cytogenetics, 13(2), 147. Abramson, N. I., Lebedev, V. S., Tesakov, A. S., & Bannikova, A. A. (2009…
			Ellobius tancrei	1638	5857	27.9665	ON333931		GQ142006	ON333900	MT478743	26721		NONE	26721	27019	Tambovtseva, V., Bakloushinskaya, I., Matveevsky, S., & Bogdanov, A. (2022). Geographic mosaic of extensive genetic variations in subterranean mole voles Ellobius alaicus as a consequence of habitat fragmentation and hybridization. Life, 12(5), 728. Abramson, N. I., Lebedev, V. S., Tesakov, A. S., & Bannikova, A. A. (2009). Supraspecies relationships in the subfamily Arvicolinae (Rodentia, Cricet…
			Eolagurus luteus	1653	5857	28.2226	MK750947		MK750981	MN735879	MK751013	ZMMU:S-189080		personal:Vladimir Lebedev:eolagurus_M11-64		ZMMU:S-189079	Bannikova, A. A., Lebedev, V. S., Poplavskaya, N. S., Simanovsky, S. A., Undrakhbayar, E., Adiya, Y., & Surov, A. S. (2019). Phylogeny and phylogeography of Arvicoline and Lagurine voles of Mongolia. Folia Zoologica, 68(2), 100-113.
			Eolagurus przewalskii	2257	5857	38.5351	MK750944	KC017827	MK750976		MK751010	ZMMU:S-192279	NMCDC 027	ZMMU:S-192280		ZMMU:S-192280	Bannikova, A. A., Lebedev, V. S., Poplavskaya, N. S., Simanovsky, S. A., Undrakhbayar, E., Adiya, Y., & Surov, A. S. (2019). Phylogeny and phylogeography of Arvicoline and Lagurine voles of Mongolia. Folia Zoologica, 68(2), 100-113.
			Eothenomys colurnus	2272	5857	38.7912	KY997349	KY997280		MH043387		NONE	NONE		NONE		Liu,S., Sun,Z., Jin,W., He,K., Murphy,R.W. and Jiang,X. 2019
			Eothenomys eleusis	2272	5857	38.7912	KY997400	KY997237		MH043375		NONE	NONE		NONE		Liu,S., Sun,Z., Jin,W., He,K., Murphy,R.W. and Jiang,X. 2019
			Eothenomys melanogaster	1322	5857	22.5713	AM392374	JQ601437	AM392399	MH043385	JX440348	T-4338 (Inst. des Sci. de l'Evol.)	ROM:112499	T-4338 (Inst. des Sci. de l'Evol.)	NONE	ZIN 96316	Galewski, T., Tilak, M. K., Sanchez, S., Chevret, P., Paradis, E., & Douzery, E. J. (2006). The evolutionary radiation of Arvicolinae rodents (voles and lemmings): relative contribution of nuclear and mitochondrial DNA phylogenies. BMC Evolutionary Biology, 6, 1-17. Bannikova, A. A., Sighazeva, A. M., Malikov, V. G., Golenishchev, F. N., & Dzuev, R. I. (2013). Genetic diversity of Chionomys genus…
			Hyperacrius fertilis	5047	5857	86.1704	KJ556725					UVM:VT282					Kohli, B. A., Speer, K. A., Kilpatrick, C. W., Batsaikhan, N., Damdinbaza, D., & Cook, J. A. (2014). Multilocus systematics and non-punctuated evolution of Holarctic Myodini (Rodentia: Arvicolinae). Molecular Phylogenetics and Evolution, 76, 18-29.
			Lagurus lagurus	1011	5857	17.2614	MK750939	KF152989	MK750967	MN735880	MK751003	ZMMU:S-180394	JW123	ZMMU:S-196434	NONE	ZMMU:S-192640	Bannikova, A. A., Lebedev, V. S., Poplavskaya, N. S., Simanovsky, S. A., Undrakhbayar, E., Adiya, Y., & Surov, A. S. (2019). Phylogeny and phylogeography of Arvicoline and Lagurine voles of Mongolia. Folia Zoologica, 68(2), 100-113. Bondareva, O., Genelt-Yanovskiy, E., Petrova, T., Bodrov, S., Smorkatcheva, A., & Abramson, N. (2021). Signatures of Adaptation in Mitochondrial Genomes of Palearctic…
			Lasiopodomys brandtii	1055	5857	18.0126	JF906120	KJ466859	KP057332	JF906134	KP057307	BS0235	NMCDC:1320	NONE	BS0235	NONE	Chen, W. C., Hao, H. B., Sun, Z. Y., Liu, Y., Liu, S. Y., & Yue, B. S. (2012). Phylogenetic position of the genus Proedromys (Arvicolinae, Rodentia): Evidence from nuclear and mitochondrial DNA. Biochemical Systematics and Ecology, 42, 59-68. Petrova, T. V., Tesakov, A. S., Kowalskaya, Y. M., & Abramson, N. I. (2016). Cryptic speciation in the narrow‐headed vole Lasiopodomys (Stenocranius) gregal…
			Lasiopodomys mandarinus	1544	5857	26.3616	FJ986322		AM392396	KP057386	KP057308	NONE		T-1066 (Inst. des Sci. de l'Evol.)	NONE	NONE	Bannikova, A. A., Lebedev, V. S., Lissovsky, A. A., Matrosova, V., Abramson, N. I., Obolenskaya, E. V., & Tesakov, A. S. (2010). Molecular phylogeny and evolution of the Asian lineage of vole genus Microtus (Rodentia: Arvicolinae) inferred from mitochondrial cytochrome b sequence. Biological Journal of the Linnean Society, 99(3), 595-613. Galewski, T., Tilak, M. K., Sanchez, S., Chevret, P., Para…
			Lemmiscus curtatus	4723	5857	80.6386	KY754010					MVZ:Mamm:208364					Steppan, S. J., & Schenk, J. J. (2017). Muroid rodent phylogenetics: 900-species tree reveals increasing diversification rates. PloS one, 12(8), e0183070.
			Lemmus amurensis	5501	5857	93.9218	KX455636					ZMMU:s150535					Abramson and Petrova, 2016
			Lemmus lemmus	3510	5857	59.9283	MK895061	MK895074	MK895081			XL1	XL4	XL4			Spitsyn, V. M., Bolotov, I. N., Kondakov, A. V., Klass, A. L., Mizin, I. A., Tomilova, A. A., ... & Gofarov, M. Y. (2021). A new Norwegian Lemming subspecies from Novaya Zemlya, Arctic Russia. Ecologica Montenegrina, 40, 93-117.
			Lemmus sibiricus	1460	5857	24.9274	KY754011	MK895071	MK895078	AM919402	MN735799	UWBM:Mamm:39305	Lem34	Lem34	NONE	NONE	Steppan, S. J., & Schenk, J. J. (2017). Muroid rodent phylogenetics: 900-species tree reveals increasing diversification rates. PloS one, 12(8), e0183070. Spitsyn, V. M., Bolotov, I. N., Kondakov, A. V., Klass, A. L., Mizin, I. A., Tomilova, A. A., ... & Gofarov, M. Y. (2021). A new Norwegian Lemming subspecies from Novaya Zemlya, Arctic Russia. Ecologica Montenegrina, 40, 93-117. Bondareva, O., …
			Lemmus trimucronatus	1185	5857	20.2322	AY219146	JF456714	MN735811	MN735882	MN735800	UAM 36268	ROM:100695	ZIN:93416	ZIN:93413	ZIN:93413	Fedorov, V. B., Goropashnaya, A. V., Jaarola, M., & Cook, J. A. (2003). Phylogeography of lemmings (Lemmus): no evidence for postglacial colonization of Arctic from the Beringian refugium. Molecular Ecology, 12(3), 725-731. Eger,J.L., Engstrom,M.D., Lim,B.K., Millar,J.S., Lobo,N.,Pruitt,W.O., Ivanova,N.V., Borisenko,A.V. and Hebert,P.D.N. Bondareva, O., Genelt-Yanovskiy, E., Petrova, T., Bodrov, …
			Mesocricetus auratus	1965	5857	33.5496	AF119265	JF444326	AF540632	FM162052		AF19870, University of Alaska Museum, University of Alaska, Fairbanks	ROM:CR7B	NONE	NONE		Conroy, C. J., & Cook, J. A. (1999). MtDNA evidence for repeated pulses of speciation within arvicoline and murid rodents. Journal of Mammalian Evolution, 6, 221-245. Eger,J.L., Engstrom,M.D., Lim,B.K., Millar,J.S., Lobo,N., Pruitt,W.O., Ivanova,N.V., Borisenko,A.V. and Hebert,P.D.N. Adkins, R. M., Walton, A. H., & Honeycutt, R. L. (2003). Higher-level systematics of rodents and divergence time e…
			Microtus abbreviatus	4714	5857	80.4849	GU809089					UAM 51869					Weksler, M., Lanier, H. C., & Olson, L. E. (2010). Eastern Beringian biogeography: historical and spatial genetic structure of singing voles in Alaska. Journal of biogeography, 37(8), 1414-1431.
			Microtus afghanus	1606	5857	27.4202	EF599108		KX455566	KX455512	KX455594	88580		NONE	NONE	NONE	Bannikova, A. A., Lebedev, V. S., & Golenishchev, F. N. (2009). Taxonomic position of Afghan vole (Subgenus Blanfordimys) by the sequence of the mitochondrial cytb gene. Russian Journal of Genetics, 45, 91-97.
			Microtus agrestis	1085	5857	18.5248	GU563299	JF499313	AM910792	MZ661175	MF099512	DK09; J.B. Searle tissue collection, University of York	ZMMU S-178919	NONE	CSCF-MAM-1324814	ZMMU S-183489	Herman, J. S., & Searle, J. B. (2011). Post-glacial partitioning of mitochondrial genetic variation in the field vole. Proceedings of the Royal Society B: Biological Sciences, 278(1724), 3601-3607. Lissovsky,A., Lim,B.K., Eger,J.L., Abramson,N.I. and Obolenskaya,E.V. Lissovsky, A. A., Petrova, T. V., Yatsentyuk, S. P., Golenishchev, F. N., Putincev, N. I., Kartavtseva, I. V., ... & Abramson, N. I…
			Microtus anatolicus	4717	5857	80.5361	FJ767742					NONE					KRYŠTUFEK, B., BUŽAN, E. V., Vohralik, V., Zareie, R., & ÖZKAN, B. (2009). Mitochondrial cytochrome b sequence yields new insight into the speciation of social voles in south-west Asia. Biological Journal of the Linnean Society, 98(1), 121-128.
			Microtus arvalis	1029	5857	17.5687	MG703100	HM380214	AM392386	MZ661174	MF099472	Mk15	NOMAM-057	T-3047 (Inst. des Sci. de l'Evol.)	CSCF-MAM-1203380	ZMMU S-196627	Sibiryakov, P. A., Tovpinets, N. N., Dupal, T. A., Semerikov, V. L., Yalkovskaya, L. E., & Markova, E. A. (2018). Phylogeography of the common vole Microtus arvalis, the obscurus form (Rodentia, Arvicolinae): new data on the mitochondrial DNA variability. Russian Journal of Genetics, 54, 1185-1198. Galewski, T., Tilak, M. K., Sanchez, S., Chevret, P., Paradis, E., & Douzery, E. J. (2006). The evo…
			Microtus brachycercus	5242	5857	89.4997	KT896523					NONE					Bezerra, A. M., Annesi, F., Aloise, G., Amori, G., Giustini, L., & Castiglia, R. (2016). Integrative taxonomy of the Italian pine voles, M icrotus savii group (C ricetidae, A rvicolinae). Zoologica Scripta, 45(3), 225-236.
			Microtus bucharensis	1539	5857	26.2763	AM392369		AM392392	KX455513	KX455595	T-1060 (Inst. des Sci. de l'Evol.)		T-1060 (Inst. des Sci. de l'Evol.)	NONE	NONE	Galewski, T., Tilak, M. K., Sanchez, S., Chevret, P., Paradis, E., & Douzery, E. J. (2006). The evolutionary radiation of Arvicolinae rodents (voles and lemmings): relative contribution of nuclear and mitochondrial DNA phylogenies. BMC Evolutionary Biology, 6, 1-17.
			Microtus cabrerae	1839	5857	31.3983	JX284284		KX455569	JX457698	JX284318	TUA37; CIBIO small mammal tissue collection		NONE	CIBIO's small mammal tissue collection, University of Porto, SM49	TUA37; CIBIO small mammal tissue collection	Paupério, J., Herman, J. S., Melo‐Ferreira, J., Jaarola, M., Alves, P. C., & Searle, J. B. (2012). Cryptic speciation in the field vole: a multilocus approach confirms three highly divergent lineages in E urasia. Molecular Ecology, 21(24), 6015-6032. Barbosa, S., Pauperio, J., Searle, J. B., & Alves, P. C. (2013). Genetic identification of I berian rodent species using both mitochondrial and nucl…
			Microtus californicus	1731	5857	29.5544	AF163891		KX455570	KC953401	KX455598	Museum of Vertebrate Zoology, #3941		NONE	MVZ:207423	NONE	Conroy, C. J., & Cook, J. A. (2000). Molecular systematics of a Holarctic rodent (Microtus: Muridae). Journal of Mammalogy, 81(2), 344-359. Schenk, J. J., Rowe, K. C., & Steppan, S. J. (2013). Ecological opportunity and incumbency in the diversification of repeated continental colonizations by muroid rodents. Systematic biology, 62(6), 837-864.
			Microtus canicaudus	4714	5857	80.4849	AF163892					University of Alaska Museum, AF#18723					Conroy, C. J., & Cook, J. A. (2000). Molecular systematics of a Holarctic rodent (Microtus: Muridae). Journal of Mammalogy, 81(2), 344-359.
			Microtus chrotorrhinus	911	5857	15.554	AF163893	MN326068	AM392383	KX455518	KX455600	University of Alaska Museum, AF#17691	USNM:MAMM:602213	T-603 (Inst. des Sci. de l'Evol.)	NONE	NONE	Conroy, C. J., & Cook, J. A. (2000). Molecular systematics of a Holarctic rodent (Microtus: Muridae). Journal of Mammalogy, 81(2), 344-359. Dove, C., Ferguson, A., Gotte, S., Jacobs, J., Klope, M., Peurach, S., ... & Whatton, J. (2016). Smithsonian biodiversity surveys of Camp Lemonnier and adjacent areas, 2014 and 2016, final report. Washington DC.
			Microtus daghestanicus	#2003	5857	34.1984	MZ198191		KP057337	MZ222056	MZ222022	(11-22)		NONE	NONE	(11-22)	Bogdanov, A. S., Khlyap, L. A., Kefelioğlu, H., Selçuk, A. Y., Stakheev, V. V., & Baskevich, M. I. (2021). High molecular variability in three pine vole species of the subgenus Terricola (Microtus, Arvicolinae) and plausible source of polymorphism. Journal of Zoological Systematics and Evolutionary Research, 59(8), 2519-2538. Petrova, T. V., Tesakov, A. S., Kowalskaya, Y. M., & Abramson, N. I. (2…
			Microtus dogramacii	4714	5857	80.4849	MK631997					FMNH 178894					Thanou, E., Paragamian, K., & Lymberakis, P. (2020). Social but lonely: Species delimitation of social voles and the evolutionary history of the only Microtus species living in Africa. Journal of Zoological Systematics and Evolutionary Research, 58(1), 475-498.
			Microtus drummondii	4801	5857	81.9703	ON989673					personal collection:James Krupa:JJK-4287					Everson, K. M., McGinnis, R. C., Burdine, O. P., Huddleston, T. R., Hylick, T. M., Keith, A. L., ... & Krupa, J. J. (2023). Disentangling morphology and genetics in two voles (Microtus pennsylvanicus and M. ochrogaster) in a region of sympatry. Journal of Mammalogy, gyac119.
			Microtus duodecimcostatus	2794	5857	47.7036	LT222301		AM392400	JX457699		CH030901-01		T-4456 (Inst. des Sci. de l'Evol.)	CIBIO's small mammal tissue collection, University of Porto, SM881		Tougard, C. (2017). Did the Quaternary climatic fluctuations really influence the tempo and mode of diversification in European rodents?. Journal of Zoological Systematics and Evolutionary Research, 55(1), 46-56. Galewski, T., Tilak, M. K., Sanchez, S., Chevret, P., Paradis, E., & Douzery, E. J. (2006). The evolutionary radiation of Arvicolinae rodents (voles and lemmings): relative contribution …
			Microtus felteni	5147	5857	87.8778	JN650050					ZMUP 8098					Thanou,E., Tryfonopoulos,G., Chondropoulos,B. and Fraguedakis-Tsolis,S.
			Microtus guatemalensis	4059	5857	69.3017	AF410262	JN311722				NONE	ROM 98323				Conroy, V. C., Hortelano, Y., Cervantes, F. A., & Cook, J. A. (2001). The phylogenetic position of southern relictual species of Microtus (Muridae: Rodentia) in North America. Mammalian Biology, 66, 332-344.
			Microtus guentheri	1547	5857	26.4128	ON324052		AM392397	KX455521	KX455603	ZIN 84013		T-4179 (Inst. des Sci. de l'Evol.)	NONE	NONE	Golenishchev, F. N., Zorenko, T. A., Petrova, T. V., Voyta, L. L., Kryuchkova, L. Y., & Atanasov, N. (2022). Evaluation of the “Bottleneck” Effect in an Isolated Population of Microtus hartingi (Rodentia, Arvicolinae) from the Eastern Rhodopes (Bulgaria) by Methods of Integrative Analysis. Diversity, 14(9), 709. Galewski, T., Tilak, M. K., Sanchez, S., Chevret, P., Paradis, E., & Douzery, E. J. (…
			Microtus hartingi	4722	5857	80.6215	ON324051					ZIN 107257-a1					Golenishchev, F. N., Zorenko, T. A., Petrova, T. V., Voyta, L. L., Kryuchkova, L. Y., & Atanasov, N. (2022). Evaluation of the “Bottleneck” Effect in an Isolated Population of Microtus hartingi (Rodentia, Arvicolinae) from the Eastern Rhodopes (Bulgaria) by Methods of Integrative Analysis. Diversity, 14(9), 709.
			Microtus ilaeus	4870	5857	83.1484	MG721548	KF152996				NONE	JW235				Golenishchev, F., Malikov, V., Petrova, T., Bodrov, S., & Abramson, N. (2019). Toward assembling a taxonomic puzzle: Case study of Iranian gray voles of the subgenus Microtus (Rodentia, Cricetidae). Mammalian Biology, 94, 98-105. Yin, Y., Jiang, W., Zhang, Z., Li, Y., Twenke, B., Turghan, M., ... & Liu, B. (2014). The divergence of small mammals in Xinjiang, China, as revealed by phylogentic anal…
			Microtus irani	1545	5857	26.3787	MH686218		KX455576	KX455522	KX455604	NONE		NONE	NONE	NONE	Demirtaş, S., & Gürler, A. T. (2019). New records of the Iranian Vole, Microtus irani Thomas, 1921, from eastern Turkey (Mammalia: Rodentia). Zoology in the Middle East, 65(1), 91-94.
			Microtus kermanensis	4875	5857	83.2337	MG721550					NONE					Golenishchev, F., Malikov, V., Petrova, T., Bodrov, S., & Abramson, N. (2019). Toward assembling a taxonomic puzzle: Case study of Iranian gray voles of the subgenus Microtus (Rodentia, Cricetidae). Mammalian Biology, 94, 98-105.
			Microtus lavernedii	3951	5857	67.4577		MZ661162		MZ661178			CSCF-MAM-1571088		CSCF-MAM-1571088		Wyler,S.
			Microtus liechtensteini	4714	5857	80.4849	LT222304					M18					Tougard, C. (2017). Did the Quaternary climatic fluctuations really influence the tempo and mode of diversification in European rodents?. Journal of Zoological Systematics and Evolutionary Research, 55(1), 46-56.
			Microtus longicaudus	891	5857	15.2126	KF964344	JF456726	AM392379	KX455523	KX455605	UAM:Mamm:23455	HLC-16281	T-136 (Inst. des Sci. de l'Evol.)	NONE	NONE	Sawyer,Y.E. and Cook,J.A. Eger,J.L., Engstrom,M.D., Lim,B.K., Millar,J.S., Lobo,N., Pruitt,W.O., Ivanova,N.V., Borisenko,A.V. and Hebert,P.D.N. Galewski, T., Tilak, M. K., Sanchez, S., Chevret, P., Paradis, E., & Douzery, E. J. (2006). The evolutionary radiation of Arvicolinae rodents (voles and lemmings): relative contribution of nuclear and mitochondrial DNA phylogenies. BMC Evolutionary Biolog…
			Microtus lusitanicus	3674	5857	62.7284	LT222305			JX457704		SP0211XA05			CIBIO's small mammal tissue collection, University of Porto, SM127		Tougard, C. (2017). Did the Quaternary climatic fluctuations really influence the tempo and mode of diversification in European rodents?. Journal of Zoological Systematics and Evolutionary Research, 55(1), 46-56. Barbosa, S., Pauperio, J., Searle, J. B., & Alves, P. C. (2013). Genetic identification of I berian rodent species using both mitochondrial and nuclear loci: Application to noninvasive s…
			Microtus majori	2004	5857	34.2155	MZ198208		KX455578	MZ222062	MZ222028	24710		NONE	24710	24710	Bogdanov, A. S., Khlyap, L. A., Kefelioğlu, H., Selçuk, A. Y., Stakheev, V. V., & Baskevich, M. I. (2021). High molecular variability in three pine vole species of the subgenus Terricola (Microtus, Arvicolinae) and plausible source of polymorphism. Journal of Zoological Systematics and Evolutionary Research, 59(8), 2519-2538. Bogdanov, A. S., Khlyap, L. A., Kefelioğlu, H., Selçuk, A. Y., Stakheev…
			Microtus mexicanus	4714	5857	80.4849	AF163897					Museum of Southwestern Biology, NK#9222					Conroy, C. J., & Cook, J. A. (2000). Molecular systematics of a Holarctic rodent (Microtus: Muridae). Journal of Mammalogy, 81(2), 344-359.
			Microtus mogollonensis	4873	5857	83.1996	OK135031					MSB:Mamm:87873					Hamm,P.S., Montoya,K.N., Montoya,L., Cook,K., Liphardt,S., Taylor,J.W., Cook,J.A. and Natvig,D.O.
			Microtus montanus	3158	5857	53.9184	KF948532		KC953278	KC953402		MSB:Mamm:121523		FMNH:145962	FMNH:145962		Sawyer,Y.E. and Cook,J.A. Schenk, J. J., Rowe, K. C., & Steppan, S. J. (2013). Ecological opportunity and incumbency in the diversification of repeated continental colonizations by muroid rodents. Systematic biology, 62(6), 837-864. Schenk, J. J., Rowe, K. C., & Steppan, S. J. (2013). Ecological opportunity and incumbency in the diversification of repeated continental colonizations by muroid rode…
			Microtus multiplex	4714	5857	80.4849	LT222307					171M					Tougard, C. (2017). Did the Quaternary climatic fluctuations really influence the tempo and mode of diversification in European rodents?. Journal of Zoological Systematics and Evolutionary Research, 55(1), 46-56. Schenk, J. J., Rowe, K. C., & Steppan, S. J. (2013). Ecological opportunity and incumbency in the diversification of repeated continental colonizations by muroid rodents. Systematic biol…
			Microtus mustersi	5203	5857	88.8339	MK631996					NHMC FC577.3					Thanou, E., Paragamian, K., & Lymberakis, P. (2020). Social but lonely: Species delimitation of social voles and the evolutionary history of the only Microtus species living in Africa. Journal of Zoological Systematics and Evolutionary Research, 58(1), 475-498.
			Microtus mystacinus	4761	5857	81.2873	KX581054					NONE					Mahmoudi, A., Darvish, J., Aliabadian, M., Yazdani Moghaddam, F., & Kryštufek, B. (2017). New insight into the cradle of the grey voles (subgenus Microtus) inferred from mitochondrial cytochrome b sequences. Mammalia, 81(6), 583-593.
			Microtus nebrodensis	5242	5857	89.4997	KT896525					NONE					Bezerra, A. M., Annesi, F., Aloise, G., Amori, G., Giustini, L., & Castiglia, R. (2016). Integrative taxonomy of the Italian pine voles, M icrotus savii group (C ricetidae, A rvicolinae). Zoologica Scripta, 45(3), 225-236.
			Microtus oaxacensis	4714	5857	80.4849	AF410260					NONE					Conroy, V. C., Hortelano, Y., Cervantes, F. A., & Cook, J. A. (2001). The phylogenetic position of southern relictual species of Microtus (Muridae: Rodentia) in North America. Mammalian Biology, 66, 332-344.
			Microtus obscurus	2878	5857	49.1378	MZ198209			MZ222063	MZ222029	24709			24709	24709	Bogdanov, A. S., Khlyap, L. A., Kefelioğlu, H., Selçuk, A. Y., Stakheev, V. V., & Baskevich, M. I. (2021). High molecular variability in three pine vole species of the subgenus Terricola (Microtus, Arvicolinae) and plausible source of polymorphism. Journal of Zoological Systematics and Evolutionary Research, 59(8), 2519-2538.
			Microtus ochrogaster	1149	5857	19.6176	KY754041	JQ601444	MF074897	MF097760	KX455612	TTU:123149	ROM:109826	TTU:123149	TTU:123149	NONE	Steppan, S. J., & Schenk, J. J. (2017). Muroid rodent phylogenetics: 900-species tree reveals increasing diversification rates. PloS one, 12(8), e0183070.
			Microtus oregoni	5010	5857	85.5387	GU954308					NONE					Fink, S., Fischer, M. C., Excoffier, L., & Heckel, G. (2010). Genomic scans support repetitive continental colonization events during the rapid radiation of voles (Rodentia: Microtus): the utility of AFLPs versus mitochondrial and nuclear sequence markers. Systematic biology, 59(5), 548-572.
			Microtus paradoxus	4717	5857	80.5361	KC953622					NONE					Kryštufek, B., Zorenko, T., & Buzan, E. V. (2012). New insights into the taxonomy and phylogeny of social voles inferred from mitochondrial cytochrome b sequences. Mammalian Biology, 77(3), 178-182.
			Microtus pennsylvanicus	1177	5857	20.0956	KC473489	JF456745	AM392376	KJ556734	KX455614	MSB:Mamm:145611	HLC-16354	T-140 (Inst. des Sci. de l'Evol.)	MSB:Mamm:149290	ZMMU_18051	Hope, A. G., Waltari, E., Payer, D. C., Cook, J. A., & Talbot, S. L. (2013). Future distribution of tundra refugia in northern Alaska. Nature Climate Change, 3(10), 931-938. Eger,J.L., Engstrom,M.D., Lim,B.K., Millar,J.S., Lobo,N., Pruitt,W.O., Ivanova,N.V., Borisenko,A.V. and Hebert,P.D.N. Galewski, T., Tilak, M. K., Sanchez, S., Chevret, P., Paradis, E., & Douzery, E. J. (2006). The evolutionar…
			Microtus pinetorum	3123	5857	53.3208	KY754042		MF074898	MF097761		OMNHN:37823		OMNHN:37823	OMNHN:37823		Steppan, S. J., & Schenk, J. J. (2017). Muroid rodent phylogenetics: 900-species tree reveals increasing diversification rates. PloS one, 12(8), e0183070.
			Microtus pyrenaicus	4714	5857	80.4849	LT222302					AR02110112					Tougard, C. (2017). Did the Quaternary climatic fluctuations really influence the tempo and mode of diversification in European rodents?. Journal of Zoological Systematics and Evolutionary Research, 55(1), 46-56.
			Microtus quasiater	4714	5857	80.4849	AF410259					NONE					Conroy, V. C., Hortelano, Y., Cervantes, F. A., & Cook, J. A. (2001). The phylogenetic position of southern relictual species of Microtus (Muridae: Rodentia) in North America. Mammalian Biology, 66, 332-344.
			Microtus richardsoni	1568	5857	26.7714	AF163905		AM392387	KX455531	KX455616	Museum of Southwestern Biology, NK#2786		T-598 (Inst. des Sci. de l'Evol.)	NONE	NONE	Conroy, C. J., & Cook, J. A. (2000). Molecular systematics of a Holarctic rodent (Microtus: Muridae). Journal of Mammalogy, 81(2), 344-359. Galewski, T., Tilak, M. K., Sanchez, S., Chevret, P., Paradis, E., & Douzery, E. J. (2006). The evolutionary radiation of Arvicolinae rodents (voles and lemmings): relative contribution of nuclear and mitochondrial DNA phylogenies. BMC Evolutionary Biology, 6…
			Microtus rossiaemeridionalis	912	5857	15.5711	MZ198210	HM380212	KX455588	KX455532	KX455617	24221	NOMAM-055	ZIN_97413	ZIN_97413	ZIN_97413	Bogdanov, A. S., Khlyap, L. A., Kefelioğlu, H., Selçuk, A. Y., Stakheev, V. V., & Baskevich, M. I. (2021). High molecular variability in three pine vole species of the subgenus Terricola (Microtus, Arvicolinae) and plausible source of polymorphism. Journal of Zoological Systematics and Evolutionary Research, 59(8), 2519-2538.
			Microtus savii	2794	5857	47.7036	LT222308	MZ661166		MZ661183		Nj40	CSCF-MAM-409972		CSCF-MAM-409972		Tougard, C. (2017). Did the Quaternary climatic fluctuations really influence the tempo and mode of diversification in European rodents?. Journal of Zoological Systematics and Evolutionary Research, 55(1), 46-56.
			Microtus schelkovnikovi	3143	5857	53.6623	LT222309		AM910794	AM919408		T-0631		NONE	NONE		Tougard, C. (2017). Did the Quaternary climatic fluctuations really influence the tempo and mode of diversification in European rodents?. Journal of Zoological Systematics and Evolutionary Research, 55(1), 46-56.
			Microtus schidlovskii	5447	5857	92.9998	KJ739801					NONE					Zorenko, T., Koren, T., & Kryštufek, B. (2014). Cytochrome b yields new insight into taxonomic scope of Microtus schidlovskii (Rodentia, Arvicolinae, Microtus). Russian Journal of Theriology. Русский териологический журнал, 13(1), 47-52.
			Microtus socialis	899	5857	15.3492	GQ352468	KF152993	FM162073	KP057389	KP057309	f.c.M socialis_Kalmykia	JW12	NONE	NONE	NONE	Bannikova, A. A., Lebedev, V. S., Lissovsky, A. A., Matrosova, V., Abramson, N. I., Obolenskaya, E. V., & Tesakov, A. S. (2010). Molecular phylogeny and evolution of the Asian lineage of vole genus Microtus (Rodentia: Arvicolinae) inferred from mitochondrial cytochrome b sequence. Biological Journal of the Linnean Society, 99(3), 595-613. Yin, Y., Jiang, W., Zhang, Z., Li, Y., Twenke, B., Turghan…
			Microtus subterraneus	1582	5857	27.0104	MZ198173	AY332685	MN735813	MZ222038	MZ222004	TRS-1	P56	NONE	TRS-1	TRS-1	Bogdanov, A. S., Khlyap, L. A., Kefelioğlu, H., Selçuk, A. Y., Stakheev, V. V., & Baskevich, M. I. (2021). High molecular variability in three pine vole species of the subgenus Terricola (Microtus, Arvicolinae) and plausible source of polymorphism. Journal of Zoological Systematics and Evolutionary Research, 59(8), 2519-2538. Pfunder, M., Holzgang, O., & Frey, J. E. (2004). Development of microar…
			Microtus tatricus	4714	5857	80.4849	LT222298					NJ77					Tougard, C. (2017). Did the Quaternary climatic fluctuations really influence the tempo and mode of diversification in European rodents?. Journal of Zoological Systematics and Evolutionary Research, 55(1), 46-56.
			Microtus thomasi	3179	5857	54.2769	LT222312		AM910797	AM919422		NJ22		NONE	NONE		Tougard, C. (2017). Did the Quaternary climatic fluctuations really influence the tempo and mode of diversification in European rodents?. Journal of Zoological Systematics and Evolutionary Research, 55(1), 46-56.
			Microtus townsendii	4714	5857	80.4849	AF163906					University of Alaska Museum, AF#18520					Conroy, C. J., & Cook, J. A. (2000). Molecular systematics of a Holarctic rodent (Microtus: Muridae). Journal of Mammalogy, 81(2), 344-359.
			Microtus transcaspicus	3155	5857	53.8672	KX581068		AM910795	AM919405		NONE		NONE	NONE		Mahmoudi, A., Darvish, J., Aliabadian, M., Yazdani Moghaddam, F., & Kryštufek, B. (2017). New insight into the cradle of the grey voles (subgenus Microtus) inferred from mitochondrial cytochrome b sequences. Mammalia, 81(6), 583-593.
			Microtus umbrosus	4714	5857	80.4849	AF410261					NONE					Conroy, V. C., Hortelano, Y., Cervantes, F. A., & Cook, J. A. (2001). The phylogenetic position of southern relictual species of Microtus (Muridae: Rodentia) in North America. Mammalian Biology, 66, 332-344.
			Microtus xanthognathus	4738	5857	80.8947	KY754044					MVZ:Mamm:149059					Steppan, S. J., & Schenk, J. J. (2017). Muroid rodent phylogenetics: 900-species tree reveals increasing diversification rates. PloS one, 12(8), e0183070.
			Microtus yuldaschi	1548	5857	26.4299	EF599113		KX455571	KX455517	KX455599	444		NONE	NONE	NONE	Bannikova, A. A., Lebedev, V. S., & Golenishchev, F. N. (2009). Taxonomic position of Afghan vole (Subgenus Blanfordimys) by the sequence of the mitochondrial cytb gene. Russian Journal of Genetics, 45, 91-97.
			Mictomicrotus liangshanensis	1315	5857	22.4518	JF906119	KP190325	GQ374492	JF906133		MGLL2-12	NONE	NONE	MGLL2-11		Chen, W. C., Hao, H. B., Sun, Z. Y., Liu, Y., Liu, S. Y., & Yue, B. S. (2012). Phylogenetic position of the genus Proedromys (Arvicolinae, Rodentia): Evidence from nuclear and mitochondrial DNA. Biochemical Systematics and Ecology, 42, 59-68. Liu, S., Jin, W., Liu, Y., Murphy, R. W., Lv, B., Hao, H., ... & Fu, J. (2017). Taxonomic position of Chinese voles of the tribe Arvicolini and the descript…
			Myopus schisticolor	1614	5857	27.5568	AF119263		GQ142001	MN735876	MN735794	University of Alaska Museum #30030		NONE	ZIN:97097	ZIN:97133	Fedorov, V. B., Goropashnaya, A. V., Boeskorov, G. G., & Cook, J. A. (2008). Comparative phylogeography and demographic history of the wood lemming (Myopus schisticolor): implications for late Quaternary history of the taiga species in Eurasia. Molecular Ecology, 17(2), 598-610. Abramson, N. I., Lebedev, V. S., Tesakov, A. S., & Bannikova, A. A. (2009). Supraspecies relationships in the subfamily…
			Neodon clarkei	3182	5857	54.3282	MW682759	KP190287				KIZ:YP180017	NONE				Song, W., Li, X., Wang, H., Chen, Z., He, S., & Jiang, X. (2021). Multi-dimensional evaluation of small mammal diversity in tree line habitats across the Three Parallel Rivers of Yunnan Protected Areas: Implications for conservation. Biodiversity Science, 29(9), 1215. Liu, S., Jin, W., Liu, Y., Murphy, R. W., Lv, B., Hao, H., ... & Fu, J. (2017). Taxonomic position of Chinese voles of the tribe A…
			Neodon forresti	4717	5857	80.5361	MW682621					KIZ:ML170038					Song, W., Li, X., Wang, H., Chen, Z., He, S., & Jiang, X. (2021). Multi-dimensional evaluation of small mammal diversity in tree line habitats across the Three Parallel Rivers of Yunnan Protected Areas: Implications for conservation. Biodiversity Science, 29(9), 1215.
			Neodon fuscus	1315	5857	22.4518	JF906122	KP190280	GQ374495	JF906131		SQCS06006	NONE		SQCS06006		Chen, W. C., Hao, H. B., Sun, Z. Y., Liu, Y., Liu, S. Y., & Yue, B. S. (2012). Phylogenetic position of the genus Proedromys (Arvicolinae, Rodentia): Evidence from nuclear and mitochondrial DNA. Biochemical Systematics and Ecology, 42, 59-68. Liu, S., Jin, W., Liu, Y., Murphy, R. W., Lv, B., Hao, H., ... & Fu, J. (2017). Taxonomic position of Chinese voles of the tribe Arvicolini and the descript…
			Neodon irene	1297	5857	22.1444	MW682573	KP190275	GU908420	JF906136		KIZ:LD170037	NONE	NIDF1	SCDB003		Song, W., Li, X., Wang, H., Chen, Z., He, S., & Jiang, X. (2021). Multi-dimensional evaluation of small mammal diversity in tree line habitats across the Three Parallel Rivers of Yunnan Protected Areas: Implications for conservation. Biodiversity Science, 29(9), 1215. Liu, S., Jin, W., Liu, Y., Murphy, R. W., Lv, B., Hao, H., ... & Fu, J. (2017). Taxonomic position of Chinese voles of the tribe A…
			Neodon leucurus	1580	5857	26.9763	OM140661	KP190292	AM392394	AM919400		NONE	NONE	NONE	NONE		Wu,Y.-D., Dai,G.-D., Li,L., Yan,H.-B. and Jia,W.-Z. 2022. Liu, S., Jin, W., Liu, Y., Murphy, R. W., Lv, B., Hao, H., ... & Fu, J. (2017). Taxonomic position of Chinese voles of the tribe Arvicolini and the description of 2 new species from Xizang, China. Journal of Mammalogy, 98(1), 166-182. Galewski, T., Tilak, M. K., Sanchez, S., Chevret, P., Paradis, E., & Douzery, E. J. (2006). The evolutiona…
			Neodon sikimensis	1620	5857	27.6592	HQ123606	MH558118	MH569060	AY163593		GB821003	NONE	NONE	USNM449126		Liu, S. Y., Sun, Z. Y., Liu, Y., Wang, H., Guo, P., & Murphy, R. W. (2012). A new vole from Xizang, China and the molecular phylogeny of the genus Neodon (Cricetidae: Arvicolinae). Zootaxa, 3235(1), 1-22. Pradhan, N., Sharma, A. N., Sherchan, A. M., Chhetri, S., Shrestha, P., & Kilpatrick, C. W. (2019). Further assessment of the Genus Neodon and the description of a new species from Nepal. Plos o…
			Neofiber alleni	3134	5857	53.5086	AM910618		AM910791	AM919425		NONE		NONE	NONE		Galewski,T., Tilak,M.K., Coskun,Y., Paradis,E. and Douzery,E.J.P.
			Neotoma fuscipes	3040	5857	51.9037	DQ781303		KT950897	KT950922		MVZ195212		TTU81391	TTU81391		Patton, J. L., Huckaby, D. G., & Álvarez-Castañeda, S. T. (2007). The evolutionary history and a systematic revision of woodrats of the Neotoma lepida group (Vol. 135). Univ of California Press. Keith, M. S. (2015). Phylogenetic relationships, divergence and radiation within the subfamily Neotominae (Rodentia: Cricetidae) (Doctoral dissertation, Ph. D. dissertation, Texas Tech University, Lubbock…
			Ondatra zibethicus	1039	5857	17.7395	KY754081	JF456977	AY294925	KC953427	AY295011	NONE	HBL008351	NONE	RA-Ondatra	NONE	Steppan, S. J., & Schenk, J. J. (2017). Muroid rodent phylogenetics: 900-species tree reveals increasing diversification rates. PloS one, 12(8), e0183070. Eger,J.L., Engstrom,M.D., Lim,B.K., Millar,J.S., Lobo,N., Pruitt,W.O., Ivanova,N.V., Borisenko,A.V. and Hebert,P.D.N. Schenk, J. J., Rowe, K. C., & Steppan, S. J. (2013). Ecological opportunity and incumbency in the diversification of repeated …
			Phenacomys intermedius	1424	5857	24.3128	KY754111	JF457091	AM392377	KC953438	KX455589	MVZ:Mamm:201914	HLC-16351	T-672 (Inst. des Sci. de l'Evol.)	MVZ:201914	NONE	Steppan, S. J., & Schenk, J. J. (2017). Muroid rodent phylogenetics: 900-species tree reveals increasing diversification rates. PloS one, 12(8), e0183070. Eger,J.L., Engstrom,M.D., Lim,B.K., Millar,J.S., Lobo,N., Pruitt,W.O., Ivanova,N.V., Borisenko,A.V. and Hebert,P.D.N. Galewski, T., Tilak, M. K., Sanchez, S., Chevret, P., Paradis, E., & Douzery, E. J. (2006). The evolutionary radiation of Arvi…
			Phenacomys ungava	5200	5857	88.7827		JF457095					ROM:96659				Eger,J.L., Engstrom,M.D., Lim,B.K., Millar,J.S., Lobo,N., Pruitt,W.O., Ivanova,N.V., Borisenko,A.V. and Hebert,P.D.N.
			Proedromys bedfordi	1315	5857	22.4518	JF906118	KU577348	GQ374486	JF906130		ZB-07-07	NONE	NONE	ZB-07-01		Chen, W. C., Hao, H. B., Sun, Z. Y., Liu, Y., Liu, S. Y., & Yue, B. S. (2012). Phylogenetic position of the genus Proedromys (Arvicolinae, Rodentia): Evidence from nuclear and mitochondrial DNA. Biochemical Systematics and Ecology, 42, 59-68. Liu, S., Jin, W., Liu, Y., Murphy, R. W., Lv, B., Hao, H., ... & Fu, J. (2017). Taxonomic position of Chinese voles of the tribe Arvicolini and the descript…
			Prometheomys schaposchnikowi	2140	5857	36.5375	AM392372		AM392395	AM919406	MN735792	T-377 (Inst. des Sci. de l'Evol.)		T-377 (Inst. des Sci. de l'Evol.)	NONE	NONE	Galewski, T., Tilak, M. K., Sanchez, S., Chevret, P., Paradis, E., & Douzery, E. J. (2006). The evolutionary radiation of Arvicolinae rodents (voles and lemmings): relative contribution of nuclear and mitochondrial DNA phylogenies. BMC Evolutionary Biology, 6, 1-17. Bondareva, O., Genelt-Yanovskiy, E., Petrova, T., Bodrov, S., Smorkatcheva, A., & Abramson, N. (2021). Signatures of Adaptation in M…
			Stenocranius gregalis	135	5857	2.30493	OP765474	KP190315	KP057326	KP057379	KP057301	ZIN:103855	NONE	ZIN 97384	ZIN 97384	ZIN 97384	Petrova, T. V., Dvoyashov, I. A., Bazhenov, Y. A., Obolenskaya, E. V., & Lissovsky, A. A. (2023). An Invisible Boundary between Geographic Ranges of Cryptic Species of Narrow-Headed Voles (Stenocranius, Lasiopodomys, Cricetidae) in Transbaikalia. Diversity, 15(3), 439. Liu, S., Jin, W., Liu, Y., Murphy, R. W., Lv, B., Hao, H., ... & Fu, J. (2017). Taxonomic position of Chinese voles of the tribe …
			Stenocranius raddei	1674	5857	28.5812	OP765406		KP057331	KP057384	KP057306	ZMMU:S-194753		ZMMU S-180442	ZMMU S-180442	ZMMU S-180442	Petrova, T. V., Dvoyashov, I. A., Bazhenov, Y. A., Obolenskaya, E. V., & Lissovsky, A. A. (2023). An Invisible Boundary between Geographic Ranges of Cryptic Species of Narrow-Headed Voles (Stenocranius, Lasiopodomys, Cricetidae) in Transbaikalia. Diversity, 15(3), 439. Petrova, T. V., Tesakov, A. S., Kowalskaya, Y. M., & Abramson, N. I. (2016). Cryptic speciation in the narrow‐headed vole Lasiopo…
			Synaptomys borealis	2106	5857	35.957	KY754161	JF457125	MF074937	MF097807		MSB:Mamm:158056	ROM:109720	MSB:Mamm:158056	MSB:Mamm:158056		Steppan, S. J., & Schenk, J. J. (2017). Muroid rodent phylogenetics: 900-species tree reveals increasing diversification rates. PloS one, 12(8), e0183070. Eger,J.L., Engstrom,M.D., Lim,B.K., Millar,J.S., Lobo,N., Pruitt,W.O., Ivanova,N.V., Borisenko,A.V. and Hebert,P.D.N.
			Synaptomys cooperi	1268	5857	21.6493	KY754162	JF457127	MN735810	KC953459	KC953221	USNM:MAMM:568611	WOP 3406	NONE	USNM:568611	USNM:568611	Steppan, S. J., & Schenk, J. J. (2017). Muroid rodent phylogenetics: 900-species tree reveals increasing diversification rates. PloS one, 12(8), e0183070. Eger,J.L., Engstrom,M.D., Lim,B.K., Millar,J.S., Lobo,N., Pruitt,W.O., Ivanova,N.V., Borisenko,A.V. and Hebert,P.D.N. Bondareva, O., Genelt-Yanovskiy, E., Petrova, T., Bodrov, S., Smorkatcheva, A., & Abramson, N. (2021). Signatures of Adaptatio…
			Volemys millicens	1330	5857	22.7079	JF906123	KP190327	GQ374481	JF906135		JJSA091	NONE	NONE	JJSA091		Chen, W. C., Hao, H. B., Sun, Z. Y., Liu, Y., Liu, S. Y., & Yue, B. S. (2012). Phylogenetic position of the genus Proedromys (Arvicolinae, Rodentia): Evidence from nuclear and mitochondrial DNA. Biochemical Systematics and Ecology, 42, 59-68.Liu, S., Jin, W., Liu, Y., Murphy, R. W., Lv, B., Hao, H., ... & Fu, J. (2017). Taxonomic position of Chinese voles of the tribe Arvicolini and the descripti…
			Volemys musseri	1315	5857	22.4518	JF906121	KP190330	GQ374484	JF906128		CY35	NONE	NONE	CY35		Chen, W. C., Hao, H. B., Sun, Z. Y., Liu, Y., Liu, S. Y., & Yue, B. S. (2012). Phylogenetic position of the genus Proedromys (Arvicolinae, Rodentia): Evidence from nuclear and mitochondrial DNA. Biochemical Systematics and Ecology, 42, 59-68. Liu, S., Jin, W., Liu, Y., Murphy, R. W., Lv, B., Hao, H., ... & Fu, J. (2017). Taxonomic position of Chinese voles of the tribe Arvicolini and the descript…
		Mean Missing Data	Mean	2723.14	5857	46.4937
		Median Missing Data	Median	2257	5857	38.5351
		Total Dataset # Nucleotide	Total Dataset	402733	872693	46.1483
		% Vouchered										81.8792	29.5302	31.5436	40.9396	32.2148
